**Paper Title** Remodeling of pre-existing myelinated axons and oligodendrocytes is stimulated by environmental enrichment in the young adult brain

**Condensed title** Myelin remodeling is stimulated by environmental enrichment

**Authors and author addresses**

Madeline Nicholson<sup>1</sup>, Rhiannon J Wood<sup>1</sup>, Jessica L Fletcher<sup>1</sup>, David G Gonsalvez<sup>1</sup>, Anthony J Hannan<sup>2</sup>, Simon S Murray<sup>1,2</sup> and Junhua Xiao<sup>1,2</sup> \*

1. Neurotrophin and Myelin Laboratory, Department of Anatomy and Neuroscience, School of Biomedical Sciences, Faculty of Medicine, Dentistry and Health Sciences, University of Melbourne, Parkville, Victoria, 3010, Australia
2. Florey Institute of Neuroscience and Mental Health, The University of Melbourne, Parkville, Victoria, 3010, Australia

**\*Corresponding author** Dr. Junhua Xiao

Department of Anatomy and Neuroscience

The University of Melbourne

Victoria 3010, Australia

Tel: (+61 3) 9035 9759

Email: [xiaoj@unimelb.edu.au](mailto:xiaoj@unimelb.edu.au)

**Conflict of interest statement**

The authors declare no conflicting financial or other interests.

**Author contributions**

JX conceived the study; MN performed the experiments and analyzed data; RW, DG and JF assisted the experiments and data analysis; AH contributed to experimental design; JX and SM supervised the study; MN and JX wrote the manuscript.

**Acknowledgements**

This study was supported by Australian Research Council Discovery Project Grant (#DP180102397) to Xiao J.; the Australian Government Research Training Program

Scholarship and the University of Melbourne STRAPA Scholarship to M.N. Confocal Microscopy was performed at the Biological Optical Microscopy Platform, The University of Melbourne ([www.microscopy.unimelb.edu.au](http://www.microscopy.unimelb.edu.au)).

## **Abstract**

Neuronal activity influences oligodendrocyte production and myelination during brain development. While it is known that the myelinating process continues across the lifespan, the extent to which neuronal activity influences oligodendrocyte production and myelin acquisition during adulthood is not fully understood. Here, we find that using environmental enrichment (EE) to physiologically upregulate neuronal activity for 6-weeks during young adulthood in C57Bl/6 mice results in increased axon diameter in the corpus callosum, with a corresponding increased thickness of pre-existing myelin sheaths. Furthermore, EE uniformly promotes the differentiation of pre-existing oligodendroglia in both corpus callosum and cerebral somatosensory cortex, while differentially altering new OPC production in these regions. Together, results of this study suggest that neuronal activity induced by EE exerts a pronounced influence on adult myelination, promoting the remodeling of pre-existing myelinated axons and accelerating the differentiation of pre-existing oligodendroglia. Importantly, we show that these effects are independent of the addition of new myelin or contributions by newly-generated oligodendroglia. This impact on pre-existing oligodendroglia and pre-existing myelin sheaths is a previously undescribed form of adaptive myelination that potentially contributes to neuronal circuit maturation in the young adult central nervous system.

1 **Introduction (4,428 characters)**

2 Oligodendrocytes (OLs) are critical components of the central nervous system (CNS), both  
3 generating the insulating myelin sheaths that facilitate rapid transmission of action  
4 potentials along axons and providing essential metabolic and trophic support to neurons  
5 (Nave & Werner, 2014). Myelination begins developmentally and is a lifelong process, with  
6 the continued production of new OLs and generation of new myelin sheaths occurring up  
7 until middle-age (Hill, Li, & Grutzendler, 2018). Studies have revealed that the myelinating  
8 process is receptive to neuronal activity (Foster, Bujalka, & Emery, 2019) and upregulation  
9 in neuronal activity during early postnatal development increase oligodendrogenesis and  
10 myelin production, with a myelination bias towards selectively activated axons (Gibson et  
11 al., 2014; Mitew et al., 2018). Conversely, downregulations in activity via social isolation  
12 during early postnatal development decreases the number of internodes and thickness of  
13 myelin sheaths (Makinodan, Rosen, Ito, & Corfas, 2012). These experimental findings, along  
14 with computational evidence that myelination pattern variations (e.g. changes to the  
15 number, length or thickness of sheaths) can markedly alter nerve conduction velocity  
16 (Castelfranco & Hartline, 2015), identifies a role for myelin in fine-tuning neuronal  
17 connectivity. Adaptability within neuronal circuitry may influence learning and memory  
18 processes and may be important across the lifespan (Douglas Fields, 2015; Timmler &  
19 Simons, 2019).

20

21 Studies investigating the effect of neuronal activity on myelination have predominantly  
22 focused on early postnatal development and often used artificial neuronal stimulation  
23 paradigms (Gibson et al., 2014; Hill, Patel, Goncalves, Grutzendler, & Nishiyama, 2014;  
24 Makinodan et al., 2012; Mensch et al., 2015; Mitew et al., 2018). Optogenetic (Gibson et al.,  
25 2014) and pharmacogenetic (Mitew et al., 2018) methods to upregulate neuronal activity  
26 during postnatal development revealed greatly increased oligodendrocyte progenitor cell  
27 (OPC) proliferation and subsequent maturation, an affect which was recapitulated, albeit to  
28 a lesser extent, in young adult animals (Mitew et al., 2018). However, these artificial  
29 methods to upregulate neuronal stimulation to promote myelin plasticity may be  
30 problematic, as they may not actually reflect physiological levels of stimulation and have  
31 recently been shown to promote the progression of tumor growth (Venkataramani et al.,  
32 2019; Venkatesh et al., 2019). Interestingly, young adult mice (Xiao et al., 2016) and rats

33 (Keiner et al., 2017) that were taught complex motor paradigms exhibited an increase in  
34 new OL production, suggesting that OL adaptability extends to adulthood and is  
35 physiologically relevant. While these findings are exciting, a complete understanding of the  
36 precise changes in cellular dynamics induced by physiologically relevant stimulation and  
37 how this ultimately influences myelin in the adult CNS remains unknown. Whether increases  
38 in OL production are driven by new OPC proliferation and subsequent differentiation, or the  
39 direct differentiation of pre-existing oligodendroglia, is yet to be comprehensively assessed.  
40 Furthermore, how the maintenance and structure of existing myelin sheaths and myelinated  
41 axons is altered and how the underlying cellular changes ultimately influence new myelin  
42 generation, is unknown. This warrants a deeper exploration of how physiologically-relevant  
43 activity-induced myelination and oligodendroglial adaptations occur at post-developmental  
44 time points.

45

46 Environmental enrichment (EE) is a non-invasive and well-studied housing paradigm that  
47 provides novel and complex stimuli to the sensory, cognitive and motor systems  
48 (Nithianantharajah & Hannan, 2006). EE is known to induce neuroplasticity including  
49 promoting synaptogenesis and neurogenesis, and results in improvements in cognitive  
50 function (Nithianantharajah & Hannan, 2006). Using EE as a paradigm of physiologically  
51 relevant, upregulated neuronal activity, we investigated the generation of new myelin and  
52 the ultrastructure of existing sheaths, and comprehensively assessed the production and  
53 lineage progression of oligodendroglia, in young adult mice. We found that 6 weeks of EE  
54 did not induce significant *de novo* myelination, however we observed greatly increased axon  
55 diameters and myelin sheath thickness in the corpus callosum, indicating a remodeling of  
56 pre-existing, myelinated axons. Further, EE uniformly accelerated the lineage progression of  
57 predominantly pre-existing oligodendroglia in both the corpus callosum and cerebral  
58 somatosensory cortex regions, but differentially influenced new OPC production in these  
59 regions. Together, our data indicate that physiologically relevant neuronal stimulation in the  
60 young adult CNS induces remodeling of myelinated axons by way of axonal-caliber  
61 dependent myelinogenesis and promotes the differentiation of pre-existing oligodendroglia.  
62 Results of this study provide new insights into the dynamics of adaptive myelination in the  
63 adult CNS, opening up new questions concerning the life-long importance of myelinated  
64 axon remodeling and oligodendroglial differentiation in CNS function.

## 65 **Materials and methods**

### 66 **Experimental animals**

67 C57BL/6 mice were bred and housed in specific pathogen-free conditions at the Melbourne  
68 Brain Centre Animal Facility, in Techniplast IVC cages (Techniplast Group, Italy). All  
69 procedures were approved by the Florey Institute for Neuroscience and Mental Health  
70 Animal Ethics Committee following, the Australian Code of Practice for the Care and Use of  
71 Animals for Scientific Purposes.

72

### 73 **Housing conditions and EdU administration**

74 At 9 weeks of age, male and female animals were randomly assigned to standard or  
75 environmentally enriched housing conditions and housed single-sex with 3 mice/cage for a  
76 period of 6 weeks. Standard-housed mice remained in shoe-box sized GM500 cages  
77 (Techniplast Group, Italy) with floor area of 501cm<sup>2</sup>. Enriched mice were moved to GR1800  
78 double-decker cages (Techniplast Group, Italy) with floor area of 1862cm<sup>2</sup> and total height  
79 of 38cm. Enriched cages included a mouse-house and a selection of rubber dog toys, small  
80 plastic objects, tunnels and climbing materials. Standard-housed mice were provided only  
81 basic bedding materials and enriched mice had additional materials including shredded  
82 paper and cardboard. All cages were changed weekly with objects in enriched cages  
83 replaced, to maintain object novelty. All mice were given access to food and water ad  
84 libitum, and were on a 12-hour light/dark cycle.

85

86 Throughout the total housing period of 6 weeks, the drinking water contained thymidine  
87 analogue EdU (5-ethynyl-2'-deoxyuridine, Thermo Fisher, cat. no: E10415) to label newly-  
88 generated cells. EdU was at a concentration of 0.2mg/ml, determined previously to be non-  
89 toxic (Young et al., 2013), and refreshed every 2-3 days.

90

### 91 **Tissue collection**

92 Mice were anesthetized and transcardially perfused with 0.1M phosphate buffer (PBS)  
93 followed by 4% EM-grade paraformaldehyde (PFA, Electron Microscopy Sciences). Brains  
94 were dissected and post-fixed overnight in 4% PFA. The first millimeter of caudal corpus  
95 callosum was selected using a coronal mouse brain matrix and micro-dissected, then placed  
96 in Kanovsky's buffer overnight, washed in 0.1M sodium cacodylate and embedded in the

97 sagittal plane in epoxy resin for transmission electron microscopy (TEM) analysis. The  
98 remaining brain was rinsed in 0.1M PBS, left overnight in a 30% sucrose solution to induce  
99 cryoprotection, then embedded in OCT and snap-frozen in isopentane over dry ice, for  
100 immunohistochemistry analysis.

101

### 102 **Immunohistochemistry and EdU labelling**

103 20 $\mu$ m coronal cryosections were collected in series on SuperFrost plus slides. Sections were  
104 incubated overnight at room temperature with primary antibodies including, rabbit anti-  
105 Olig2 (Millipore, #AB9610, 1:200), mouse anti-APC/CC1 (CalBioChem, #OP-80, 1:200), and  
106 goat anti-platelet derived growth factor receptor-alpha (PDGFR $\alpha$ , R&D systems #AF1062,  
107 1:200), in a PBS-based diluent buffer containing 10% normal donkey serum and 0.2% Triton-  
108 X100, then washed with 0.1M PBS and dark-incubated for 4h at room temperature with  
109 appropriate secondary antibodies including, donkey anti-rabbit 594 and donkey anti-goat  
110 555 (Alexa Fluor, Invitrogen, 1:200) and donkey anti-mouse 405 (Abcam, ab175658, 1:200),  
111 in the same PBS-based diluent. Sections were washed with 0.1M PBS, and dark-incubated in  
112 the EdU developing cocktail prepared as per product instructions (Click-iT<sup>TM</sup> EdU Alexa  
113 Fluor<sup>TM</sup> 647 Imaging Kit, Thermo Fisher, cat. no: C10340) for 2h at room temperature, for  
114 EdU detection. Sections were washed a final time in 0.1M PBS and mounted in DAKO  
115 fluorescence mounting medium (Agilent Dako, cat. no: S3023).

116

### 117 **Spectral unmixing confocal microscopy imaging and cell counting**

118 Images were obtained using a 20x objective on a Zeiss LSM880 laser scanning confocal  
119 microscope with 405nm, 561nm and 633nm laser lines and Zen Black 2.3 image acquisition  
120 software. Images were taken in Lamda mode, using a ChS1 spectral GaAsP (gallium arsenide  
121 phosphide) detector to capture the entire spectrum of light, generating one image  
122 containing all fluorophores. An individual spectrum for each fluorophore was obtained by  
123 imaging control, single-stained slides and these spectra used to segregate each multi-  
124 fluorophore image into a 4-channel image, in a post-processing step under the linear un-  
125 mixing function. Uniform settings were used across experiments. Consistent regions of  
126 interest (ROI) were maintained across animals; mid-line corpus callosum and primary  
127 somatosensory cortex at approximately Bregma -1.64mm, and 3-4 images per ROI per  
128 animal were taken.

129

130 Images were manually counted by assessors blinded to housing conditions, using ImageJ/FIJI  
131 software. Oligodendroglia were defined as Olig2+, OPCs as Olig2+/ PDGFR $\alpha$ + double-  
132 labelled cells, mature OLs as Olig2+/CC1+ double-labelled cells and intermediate  
133 oligodendroglia as Olig2+/CC1-/ PDGFR $\alpha$ -. The area of corpus callosum and somatosensory  
134 cortex was measured in each image and counts normalized.

135

### 136 **SCoRe microscopy imaging and analysis**

137 20 $\mu$ m thick coronal sections were imaged on a Zeiss LSM880 laser scanning confocal  
138 microscope with a 40x water immersion objective using 488nm, 561nm and 633nm laser  
139 lines passed through the Acousto-Optical Tunable Filters 488-640 filter/splitter and a 20/80  
140 partially reflective mirror. Compact myelin reflected light that was then collected using  
141 three photodetectors set to collect narrow bands of light around the laser wavelengths.  
142 Uniform settings were used across experiments. Images were acquired in tile scans of 5 $\mu$ m  
143 z-stacks, at a minimum z-depth of 5 $\mu$ m from the surface. ROIs were consistent with spectral  
144 images and 3-4 images per ROI per animal were taken. Image analysis was performed in  
145 ImageJ/FIJI. Maximum intensity z-projection images were applied a minimum threshold cut-  
146 off and the resulting area of positive pixels in each ROI measured.

147

### 148 **Transmission electron microscopy and analysis**

149 Semi-thin (0.5-1 $\mu$ m) sections of caudal corpus callosum were collected on glass slides in the  
150 sagittal plane and stained with 1% toluidine blue, before subsequent ultrathin (0.1 $\mu$ m)  
151 sections were collected on 3x3mm copper grids. Ultrathin sections were viewed using a  
152 JEOL JEM-1400Flash TEM. Images were captured using the JEOL integrated software and a  
153 high-sensitivity sCMOS camera (JEOL Matataki Flash). Eight-ten distinct fields of view were  
154 imaged at 10,000x magnification per animal. FIJI/Image J image analysis software (National  
155 Institutes of Health) was used to count myelinated axons and the Trainable WEKA  
156 Segmentation plugin (Leslie & Heese, 2017) used to segregate myelin, allowing use of the  
157 magic wand tool to measure inner and outer axon areas, to obtain axon diameter  
158 distribution and calculate g-ratios. For each animal, at least 100 axons were measured.



159 Resin embedding, sectioning, post-staining and EM imaging was performed at the Peter  
160 MacCallum Centre for Advanced Histology and Microscopy.

161

## 162 **Statistical analysis**

163 All data was analyzed and graphed in GraphPad Prism vs8 software. Data were assumed to  
164 be normally distributed and variance assumed to be equal between groups. Sample size was  
165 determined based on what is generally used in the field. EM data was analyzed using a 2-  
166 way ANOVA with Sidak's multiple comparison test or un-paired two-tailed t-test. Spectral  
167 and SCoRe imaging data was analyzed using an un-paired two-tailed t-test. Data are  
168 presented as mean  $\pm$  SEM. A significance threshold  $p$ -value of 0.05 was used.

169

170

171

172 **Results/Discussion** (15,309 characters)

173 **Environmental enrichment increases axonal caliber and promotes myelinogenesis**

174 To physiologically induce neuronal activity, we adopted the well-established EE housing  
175 paradigm (Nithianantharajah & Hannan, 2006). Mice were housed in EE or standard-housed  
176 (SH) control conditions for a period of 6-weeks and administered the thymidine analogue  
177 EdU in the drinking water throughout to label newly-generated cells. To verify this housing  
178 paradigm, we confirmed neurogenesis in the hippocampus, a well-defined read out of EE  
179 (Nithianantharajah & Hannan, 2006). We observed a significant increase in the density of  
180 EdU+ cells in the dentate gyrus of EE mice compared to SH control mice ( $862 \pm 108.7$   
181 cells/mm<sup>2</sup> compared to  $453 \pm 10.1$  cells/mm<sup>2</sup>,  $p=0.02$ , Student's t-test,  $n=3-4$  mice/group,  
182 data = mean  $\pm$  SEM).

183 We initially investigated the influence that EE exerts on myelin plasticity by assessing the  
184 myelinated area in the corpus callosum (Fig. 1A) using SCoRe microscopy, a reflection signal  
185 of compact myelin generated by incident lasers of multiple wavelengths (Schain, Hill, &  
186 Grutzendler, 2014). Analysis of the overall myelinated area detected no significant  
187 difference between EE and SH control mice in the corpus callosum (Fig. 1A, quantitated in  
188 Fig. 1C), indicative of no significant change to *de novo* myelination. Due to recent  
189 observations of continued myelin generation in the cortex throughout the lifespan (Hill et  
190 al., 2018) and acknowledgement that grey matter myelination is emerging as a key area of  
191 myelin plasticity (Timmler & Simons, 2019), we also applied SCoRe microscopy to the  
192 overlying region of the somatosensory cortex, from which the callosal projection fibers  
193 originate (Fig. 1B). Similar to the corpus callosum, we observed no significant change to the  
194 percentage area of myelin coverage following EE housing in this region (Fig. 1B, quantitated  
195 in Fig. 1D). Additional layer-specific analysis revealed that deeper cortical layers were more  
196 heavily myelinated than superficial layers (Fig. 1E,  $p=0.006$ ), however no region-dependent  
197 difference was found between housing conditions. Collectively, these data suggest there is  
198 no *de novo* myelination following EE in either corpus callosum or somatosensory cortex.

199

200 To further determine if EE exerts an influence upon myelin ensheathment, we assessed  
201 myelin ultrastructure using TEM in the corpus callosum (Fig. 2A). Concordant with the SCoRe  
202 imaging data, we found no significant change in the percentage of myelinated axons  
203 between housing conditions (Fig. 2B), confirming that EE did not increase *de novo*

204 myelination of previously unmyelinated axons. This finding is perhaps unsurprising as by P90  
205 the proportion of myelinated axons in the murine corpus callosum has almost peaked  
206 (Sturrock, 1980). Interestingly, analysis of the frequency distribution of myelinated axons  
207 relative to their axonal diameter showed that EE mice had a significantly larger axonal  
208 diameters compared to SH control (Fig. 2C,  $p=0.008$ ). There was an approximately 30-50%  
209 reduction in the proportion of axons with small diameters (0.2-0.5 $\mu\text{m}$ ) and a corresponding  
210 increase in the proportion of axons with large diameters (0.8-2.3 $\mu\text{m}$ ), resulting in an overall  
211  $\sim 30\%$  increase in the mean diameter of myelinated axons in EE mice compared to SH control  
212 mice (Fig. 2D,  $p=0.02$ ). Previous analyses of high-frequency stimulation of hippocampal  
213 neurons has shown that axon diameters can increase by  $\sim 5\%$  upon a time scale of 10-30  
214 minutes (Chéreau, Saraceno, Angibaud, Cattaert, & Nägerl, 2017). This finding together with  
215 our data suggest that over a sustained period of physiologically relevant stimulation, the  
216 overall axon diameter can continue to increase up to 30%. More intriguingly, in addition to  
217 axonal caliber changes we also found a significant reduction in overall g-ratios in EE mice  
218 compared to SH controls (Fig. 2E,  $p<0.0001$ ), indicative of thicker myelin sheaths. This  
219 reduction in g-ratios was observed across the full range of axon diameters (Fig. 2F,  
220  $p<0.0001$ ), indicating that EE exerts an unbiased effect upon axonal growth and  
221 myelinogenesis. These observations are consistent with previous studies identifying  
222 increased corpus callosum volume following EE housing (Markham, Herting, Luszpak,  
223 Juraska, & Greenough, 2009; Zhao et al., 2012). Our results provide clear evidence that  
224 young adult CNS myelination is highly adaptive to positive environmental experiences. We  
225 demonstrate that EE exerts a significant influence upon myelinated axon plasticity in the  
226 young adult brain by selectively promoting myelin growth of existing myelin sheaths, but  
227 not increasing *de novo* myelination of unmyelinated axons.

228

229 Increasing evidence suggests that myelin remains a dynamic structure throughout the  
230 lifespan, as observed by fluctuations in internode length (Hill et al., 2018) and turnover of  
231 myelin (Lüders et al., 2019; Yeung et al., 2014), implying there are molecular substrates  
232 susceptible to adaptive regulation. Increasing myelin thickness in response to upregulated  
233 neuronal activity may be critical in meeting enhanced metabolic demands of axons  
234 (Fünfschilling et al., 2012; Lee et al., 2012; Saab et al., 2016) and emerging evidence  
235 suggests this is necessary in sustaining function of highly active circuits (Moore et al., 2019).

236 A recent study has demonstrated activity-dependent localization of myelin protein mbpa  
237 mRNA within developing myelin sheaths (Yergert, Hines, & Appel, 2019), indicating a  
238 potential molecular correlate of localized sheath growth. Furthermore, bi-directional  
239 fluctuations in myelin thickness would be important in enabling adaptive responses to all  
240 manner of changing environmental conditions and indeed, myelin thinning has been  
241 observed following social isolation (Liu et al., 2012; Makinodan et al., 2012) and chronic  
242 social stress (Bonnefil et al., 2019). It is important to note that conduction velocity can be  
243 modulated by ultrastructural changes in both the axon and myelin sheath (Arancibia-  
244 Cárcamo et al., 2017; Ford et al., 2015; Waxman, 1980), which ultimately influence neuronal  
245 circuit connectivity (Ford et al., 2015; Lang, 2002) and enable adaptive-learning. Thus, in our  
246 study, the contribution of increased axonal caliber, accompanied by thicker myelin sheaths  
247 as a result of EE, to neuronal plasticity and function cannot be underestimated. The  
248 myelinated axon is a functional unit and as has been recently proposed, the term  
249 myelinated axon plasticity more accurately reflects underlying physiology (Lyons, 2017).  
250 Together with published work, our finding indicates that a positive life experience such as EE  
251 can exert a strong influence on increasing axonal caliber and the thickness of existing myelin  
252 sheaths in the adult CNS, ultimately leading to enhanced neuronal plasticity and CNS  
253 functioning, in terms of signal transmission and connectivity.

254

### 255 **Environmental enrichment promotes the differentiation of pre-existing oligodendroglia in** 256 **the corpus callosum and somatosensory cortex**

257 To investigate whether EE influences the dynamics of OL production and integration in  
258 addition to myelin plasticity, we used spectral un-mixing confocal microscopy and  
259 comprehensively analyzed the density and proportion of all oligodendroglia, both pre-  
260 existing and newly-generated during the 6 week EE period. We assessed total  
261 oligodendroglia (Olig2+), OPCs (Olig2+/Pdgfr $\alpha$ +), intermediate oligodendroglia  
262 (Olig2+/Pdgfr $\alpha$ -/CC1-) and mature OLs (Olig2+/CC1+), distinguishing between  
263 subpopulations of pre-existing (EdU-) and newly-generated (EdU+) oligodendroglia (Fig. 3A).

264

265 To align with our myelin data, adjacent regions of corpus callosum and somatosensory  
266 cortex were analyzed. In both regions, we observed a clear significant increase in the overall  
267 density of mature OLs (callosum: Fig. 3C,  $p=0.02$ , cortex: Fig. 4B  $p=0.02$ ) accompanied by a

268 reduction in OPCs in EE mice compared to SH controls, indicative of increased cell  
269 maturation. This effect was more pronounced in the cortex, where EE led to a significant  
270 increase in overall OL density (Fig. 4B,  $p=0.04$ ) compared to SH controls. This finding is  
271 concordant with previous observations of enhanced differentiation following activity-  
272 dependent stimulation (Cullen et al., 2019; Gibson et al., 2014; Hughes, Orthmann-Murphy,  
273 Langseth, & Bergles, 2018; Keiner et al., 2017; Mitew et al., 2018; Xiao et al., 2016).

274

275 To define the altered dynamics of OL production induced by EE, we quantitated the  
276 densities of both pre-existing (EdU-) and newly-generated (EdU+) OPCs, mature OLs and  
277 intermediate oligodendroglia (callosum: Fig. 3D-E, cortex: Fig. 4C-D). We found a  
278 significantly higher density of pre-existing mature OLs in EE mice compared to SH controls  
279 (callosum: Fig. 3D,  $p=0.007$ , cortex: Fig. 4C  $p=0.04$ ), suggesting that EE exerts a uniform  
280 effect upon promoting the lineage progression of pre-existing oligodendroglia, which  
281 contributes to the overall enhanced OL differentiation observed in both regions (callosum:  
282 Fig. 3C, cortex: Fig. 4B). This effect could be at least partially due to enhanced survival, as  
283 has been shown previously that EE enhances the survival of newly-generated  
284 oligodendroglia in the amygdala (Okuda et al., 2009). Furthermore, stimulating neuronal  
285 circuits via transcranial magnetic stimulation or complex motor learning results in more new  
286 pre-myelinating OLs in the motor and visual cortices (Cullen et al., 2019) or enhances the  
287 differentiation and integration of pre-existing cells (captured via EdU administration prior to  
288 paradigm onset) (Xiao et al., 2016), respectively. Thus, our finding well aligns with these  
289 published studies and suggests that providing positive experience such as EE promotes the  
290 differentiation of pre-existing oligodendroglia in the young adult brain.

291

292 We then analyzed the proportions of pre-existing (EdU-) and newly-generated (EdU+) OPCs,  
293 mature OLs and intermediate oligodendroglia in the two regions (callosum: Fig. 3F, cortex:  
294 Fig. 4E), which revealed a significant increase in the proportion of pre-existing mature OLs  
295 (callosum: Fig. 3F, overall, pre-existing:  $p=0.0002$ ,  $p=0.0001$  cortex: Fig 4E, overall, pre-  
296 existing:  $p=0.02$ ,  $p=0.02$ ), further confirming increased differentiation. In the corpus  
297 callosum, this was accompanied by a decrease in percentage of pre-existing intermediate  
298 oligodendroglia (Fig. 3F overall, pre-existing:  $p=0.008$ ,  $p=0.0005$ ), and in the cortex, a  
299 decrease in the proportion of pre-existing OPCs (Fig. 4E overall, pre-existing,  $p=0.02$ ,

300 p=0.01). Furthermore, the proportions assessment (Fig. 3F, 4E) also revealed a reduced  
301 percentage of new OPCs in both regions (callosum: Fig. 3F, p=0.002, cortex: Fig. 4E, p=0.02)  
302 in EE mice compared to SH, suggesting that EE also promotes the direct differentiation of  
303 OPCs post-cell division. Recently, it was observed that the basal level of maturation of  
304 newly-generated OPCs in the cortex of middle-aged mice is only 22%, but incorporation of  
305 these cells can be increased 5-fold with sensory stimulation (Hughes et al., 2018), implying  
306 that the ongoing production and integration of OLs can be altered by environmental  
307 manipulations. Our data further confirm that the young adult brain contains an accessible  
308 reserve of oligodendroglia for activity-dependent responsiveness and that the lineage  
309 progression of pre-existing cells is particularly sensitive to EE stimulation. However, the  
310 main source of pre-existing oligodendroglia, intermediate or OPC, appears to be regulated  
311 differentially between the regions.

312

### 313 **Environmental enrichment differentially regulates OPC dynamics in the corpus callosum** 314 **and somatosensory cortex**

315 Having identified that EE uniformly increases the density of mature OLs, we found a uniform  
316 decrease in the density of total OPCs in EE mice compared to SH controls, implying that the  
317 enhanced differentiation occurs at the expense of altering new OPC generation.

318 Interestingly, we found that EE resulted in significantly fewer newly-generated OPCs in the  
319 corpus callosum (Fig. 3E p=0.001), whereas in the somatosensory cortex, this reduction is  
320 specific to pre-existing OPCs (cortex: Fig. 4C p=0.01). This finding is somewhat  
321 counterintuitive as previous studies have identified neuronal activity-dependent increases in  
322 OPC production, albeit with greatly attenuated responses observed when conducted in  
323 young adult animals (P60) (Mckenzie et al., 2014; Mitew et al., 2018) as compared to  
324 juvenile animals (P19-35) (Gibson et al., 2014; Mitew et al., 2018). These studies adopted  
325 artificial neuronal stimulation paradigms with potentially greater levels of stimulation than  
326 those induced via EE in our study, however it does suggest that age is a critical factor in the  
327 proliferative capacity of OPCs. It is also important to note that inherently, production and  
328 differentiation cannot occur simultaneously, as differentiation removes an available  
329 proliferative cell. Thus, our finding that EE results in an overall increase in mature OLs  
330 accompanied by an overall reduction in OPCs indicates that physiological stimulation of  
331 neuronal activity favorably promotes oligodendroglial differentiation, which alters the

332 dynamics of OPC production in the young adult brain. We have previously shown that there  
333 is a drastic decline in OPC density occurring across different CNS regions from P9-30  
334 (Nicholson et al., 2018). Furthermore, as OPC density decreases, although they remain  
335 evenly tiled (Hughes, Kang, Fukaya, & Bergles, 2013), the probability that a cell will be in  
336 close proximity to a specifically activated axon and thus able to sense and respond to  
337 changing activity levels, is also reduced. Results from this study and others suggest that  
338 adult animals retain an ability to respond to neuronal activity and attenuated responses  
339 may be due to logistical constraints on cell numbers, rather than inhibitive cellular  
340 environments. Our finding suggests that EE accelerates the normal process of OL production  
341 and integration in the young adult brain via enhancing differentiation, ultimately resulting in  
342 a reduction in OPCs.

343

344 To further determine the differential reduction in new OPC generation we examined the  
345 proportional contributions of new vs pre-existing oligodendroglia to the pool of total  
346 oligodendroglia, OCPs, mature OLs and intermediate oligodendroglia in both regions. In the  
347 corpus callosum, the overall proportion of pre-existing oligodendroglia was significantly  
348 increased in EE mice compared to SH controls (Fig. 3G,  $p=0.03$ ), which is reflected by  
349 increased proportions of both pre-existing OPCs (Fig. 3G,  $p=0.009$ ) and pre-existing mature  
350 OLs (Fig. 3G,  $p=0.03$ ). Interestingly, EE exerted no significant influence upon the relative  
351 proportions of pre-existing and new oligodendroglia in somatosensory cortex (Fig. 4F). This  
352 data demonstrates clear regional heterogeneity in response to the EE paradigm. In the  
353 corpus callosum EE reduces the contribution of newly-generated oligodendroglia by  
354 markedly increasing the direct incorporation of pre-existing oligodendroglia, whereas within  
355 the somatosensory cortex the incorporation of pre-existing oligodendroglia induced by EE  
356 does not affect the generation of new OPCs to the same extent. Cortical and callosal OPCs  
357 behave differently from early postnatal development (Nicholson et al., 2018). Furthermore,  
358 subsets of OPCs have been identified based on differential expression of ion channels and  
359 neurotransmitter receptors, and relative proportions of each subtype differ regionally  
360 (Spitzer et al., 2019), indicating a heterogenous distribution of OPCs that could partially  
361 explain the distinct response to EE.

362

363 Results of our study suggest that in the young adult brain, positive experience  
364 predominantly influences the plasticity of pre-existing oligodendroglia and existing myelin  
365 sheaths, without substantial *de novo* myelin sheath generation. Future studies concerned  
366 with myelin plasticity should attempt to distinguish between changes appearing due to  
367 generation of new OLs and new myelin sheaths, and changes appearing due to influences on  
368 pre-existing cells, axons and sheaths. This difference is subtle, yet critical in understanding  
369 the implications and relevance of adaptive myelination in animals across the lifespan from  
370 developmental, to aging stages, as well as in translating these findings for therapeutic  
371 benefit in the context of demyelinating diseases. Techniques to capture such specific  
372 changes could include methods that measure myelin generation and turnover, which were  
373 recently nicely reviewed (Buscham, Eichel, Siems, & Werner, 2019). Additionally, genetic  
374 approaches that enable inducible and OL-specific expression of a myelin-associated  
375 membrane-bound fluorescent protein (Hill & Grutzendler, 2019) in conjunction with time-  
376 lapse *in vivo* imaging, would provide a more detailed spatial and temporal analysis of the  
377 adaptive myelinating process.

378

379 In summary, we are the first to demonstrate that providing physiologically relevant  
380 neuronal stimulation via EE exerts a strong influence upon adult myelin remodeling,  
381 increasing the diameter and promoting myelin wrapping of pre-existing myelinated axons.  
382 This study provides a systematic assessment of oligodendroglial lineage dynamics in a  
383 healthy, young adult brain and importantly identifies that EE uniformly increases the  
384 differentiation of pre-existing oligodendroglia in both corpus callosum and somatosensory  
385 cortex, with a region-specific influence on new OPC generation. This contrasts with previous  
386 studies that have adopted non-physiological strategies to manipulate neuronal activity and  
387 found notable increases in new OPC production and *de novo* myelination of previously  
388 unmyelinated axons. Results of this study extend our understanding of myelinated axon  
389 plasticity and provide new insights into how altering neuronal activity at a physiological level  
390 can modulate existing axons, myelin sheaths and pre-existing oligodendroglial maturation.  
391 Findings of this study will provide a platform for future investigation into the functional  
392 importance of oligodendroglial differentiation and myelinated axon remodeling for behavior  
393 and cognition throughout the lifespan.



## References

- Arancibia-Cárcamo, I. L., Ford, M. C., Cossell, L., Ishida, K., Tohyama, K., & Attwell, D. (2017). Node of ranvier length as a potential regulator of myelinated axon conduction speed. *ELife*, *6*, 1–15. <https://doi.org/10.7554/eLife.23329>
- Bonnefil, V., Dietz, K., Amatruda, M., Wentling, M., Aubry, A. V, Dupree, J. L., ... Liu, J. (2019). Region-specific myelin differences define behavioral consequences of chronic social defeat stress in mice. *ELife*, *8*, 1–13. <https://doi.org/10.7554/eLife.40855>
- Buscham, T., Eichel, M., Siems, S., & Werner, H. (2019). Turning to myelin turnover. *Neural Regeneration Research*, *14*(12), 2063. <https://doi.org/10.4103/1673-5374.262569>
- Castelfranco, A. M., & Hartline, D. K. (2015). The evolution of vertebrate and invertebrate myelin: a theoretical computational study. *Journal of Computational Neuroscience*, *38*(3), 521–538. <https://doi.org/10.1007/s10827-015-0552-x>
- Chéreau, R., Saraceno, G. E., Angibaud, J., Cattaert, D., & Nägerl, U. V. (2017). Superresolution imaging reveals activity-dependent plasticity of axon morphology linked to changes in action potential conduction velocity. *Proceedings of the National Academy of Sciences of the United States of America*, *114*(6), 1401–1406. <https://doi.org/10.1073/pnas.1607541114>
- Cullen, C. L., Senesi, M., Tang, A. D., Clutterbuck, M. T., Auderset, L., O'Rourke, M. E., ... Young, K. M. (2019). Low-intensity transcranial magnetic stimulation promotes the survival and maturation of newborn oligodendrocytes in the adult mouse brain. *Glia*, (March), *glia.23620*. <https://doi.org/10.1002/glia.23620>
- Douglas Fields, R. (2015). A new mechanism of nervous system plasticity: activity-dependent myelination. *Nature Reviews. Neuroscience*, *16*(12), 756–767. <https://doi.org/10.1038/nrn4023>
- Ford, M. C., Alexandrova, O., Cossell, L., Stange-Marten, A., Sinclair, J., Kopp-Scheinpflug, C., ... Grothe, B. (2015). Tuning of Ranvier node and internode properties in myelinated axons to adjust action potential timing. *Nature Communications*, *6*, 8073. <https://doi.org/10.1038/ncomms9073>
- Foster, A. Y., Bujalka, H., & Emery, B. (2019). Axoglial interactions in myelin plasticity: Evaluating the relationship between neuronal activity and oligodendrocyte dynamics. *Glia*, (February), *glia.23629*. <https://doi.org/10.1002/glia.23629>
- Fünfschilling, U., Supplie, L. M., Mahad, D., Boretius, S., Saab, A. S., Edgar, J., ... Nave, K. A.

- (2012). Glycolytic oligodendrocytes maintain myelin and long-term axonal integrity. *Nature*, *485*(7399), 517–521. <https://doi.org/10.1038/nature11007>
- Gibson, E. M., Purger, D., Mount, C. W., Goldstein, A. K., Lin, G. L., Wood, L. S., ... Monje, M. (2014). Neuronal Activity Promotes Oligodendrogenesis and Adaptive Myelination in the Mammalian Brain. *Science*, *344*(6183), 1252304–1252304. <https://doi.org/10.1126/science.1252304>
- Hill, R. A., & Grutzendler, J. (2019). Uncovering the biology of myelin with optical imaging of the live brain. *Glia*, (February), *glia*.23635. <https://doi.org/10.1002/glia.23635>
- Hill, R. A., Li, A. M., & Grutzendler, J. (2018). Lifelong cortical myelin plasticity and age-related degeneration in the live mammalian brain. *Nature Neuroscience* *2018*, *26*, 1. <https://doi.org/10.1038/s41593-018-0120-6>
- Hill, R. A., Patel, K. D., Goncalves, C. M., Grutzendler, J., & Nishiyama, A. (2014). Modulation of oligodendrocyte generation during a critical temporal window after NG2 cell division. *Nature Neuroscience*, *17*(11), 1518–1527. <https://doi.org/10.1038/nn.3815>
- Hughes, E. G., Kang, S. H., Fukaya, M., & Bergles, D. E. (2013). Oligodendrocyte progenitors balance growth with self-repulsion to achieve homeostasis in the adult brain. *Nature Neuroscience*, *16*(6), 668–676. <https://doi.org/10.1038/nn.3390>
- Hughes, E. G., Orthmann-Murphy, J. L., Langseth, A. J., & Bergles, D. E. (2018). Myelin remodeling through experience-dependent oligodendrogenesis in the adult somatosensory cortex. *Nature Neuroscience* *2018*, *1*. <https://doi.org/10.1038/s41593-018-0121-5>
- Keiner, S., Niv, F., Neumann, S., Steinbach, T., Schmeer, C., Hornung, K., ... Redecker, C. (2017). Effect of skilled reaching training and enriched environment on generation of oligodendrocytes in the adult sensorimotor cortex and corpus callosum. *BMC Neuroscience*, *18*(1), 31. <https://doi.org/10.1186/s12868-017-0347-2>
- Lang, E. J. (2002). Role of Myelination in the Development of a Uniform Olivocerebellar Conduction Time. *Journal of Neurophysiology*, *89*(4), 2259–2270. <https://doi.org/10.1152/jn.00922.2002>
- Lee, Y., Morrison, B. M., Li, Y., Lengacher, S., Farah, M. H., Hoffman, P. N., ... Rothstein, J. D. (2012). Oligodendroglia metabolically support axons and contribute to neurodegeneration. *Nature*, *487*(7408), 443–448. <https://doi.org/10.1038/nature11314>

- Leslie, M. E., & Heese, A. (2017). Quantitative Analysis of Ligand-Induced Endocytosis of FLAGELLIN-SENSING 2 Using Automated Image Segmentation. In *Trends in Immunology* (Vol. 35, pp. 39–54). [https://doi.org/10.1007/978-1-4939-6859-6\\_4](https://doi.org/10.1007/978-1-4939-6859-6_4)
- Liu, J., Dietz, K., Deloyht, J. M., Pedre, X., Kelkar, D., Kaur, J., ... Casaccia, P. (2012). Impaired adult myelination in the prefrontal cortex of socially isolated mice. *Nature Neuroscience*, *15*(12), 1621–1623. <https://doi.org/10.1038/nn.3263>
- Lüders, K. A., Nessler, S., Kusch, K., Patzig, J., Jung, R. B., Möbius, W., ... Werner, H. B. (2019). Maintenance of high proteolipid protein level in adult central nervous system myelin is required to preserve the integrity of myelin and axons. *Glia*, *67*(4), 634–649. <https://doi.org/10.1002/glia.23549>
- Lyons, D. A. (2017). On Myelinated Axon Plasticity and Neuronal Circuit Formation and Function, *37*(Xx), 10023–10034. <https://doi.org/10.1523/JNEUROSCI.3185-16.2017>
- Makinodan, M., Rosen, K. M., Ito, S., & Corfas, G. (2012). A Critical Period for Social Experience-Dependent Oligodendrocyte Maturation and Myelination. *Science*, *337*(6100), 1357–1360. <https://doi.org/10.1126/science.1220845>
- Markham, J. A., Herting, M. M., Luszpak, A. E., Juraska, J. M., & Greenough, W. T. (2009). Myelination of the corpus callosum in male and female rats following complex environment housing during adulthood. *Brain Research*, *1288*, 9–17. <https://doi.org/10.1016/j.brainres.2009.06.087>
- Mckenzie, I. A., Ohayon, D., Li, H., Faria, J. P. De, Emery, B., Tohyama, K., & Richardson, W. D. (2014). Motor skill learning requires active central myelination. *Science*, *346*(6207), 318–322. <https://doi.org/10.1126/science.1254960>
- Mensch, S., Baraban, M., Almeida, R., Czopka, T., Ausborn, J., El Manira, A., & Lyons, D. A. (2015). Synaptic vesicle release regulates myelin sheath number of individual oligodendrocytes in vivo. *Nature Neuroscience*, *18*(5), 628–630. <https://doi.org/10.1038/nn.3991>
- Mitew, S., Gobius, I., Fenlon, L. R., Mcdougall, S., Hawkes, D., Xing, Y. L., ... Emery, B. 6. (2018). Pharmacogenetic stimulation of neuronal activity increases myelination 1 in an axon-specific manner 2 3. *Nature Communications*, 1–16. <https://doi.org/10.1038/s41467-017-02719-2>
- Moore, S., Meschkat, M., Ruhwedel, T., Tzvetanova, I. D., Trevisiol, A., Kusch, K., ... Biosciences, M. (2019). A role of oligodendrocytes in information processing

independent of conduction velocity.

- Nave, K.-A., & Werner, H. B. (2014). Myelination of the Nervous System: Mechanisms and Functions. *Annual Review of Cell and Developmental Biology*, *30*, 503–533.  
<https://doi.org/10.1146/annurev-cellbio-100913-013101>
- Nicholson, M., Wood, R. J., Fletcher, J. L., van den Buuse, M., Murray, S. S., & Xiao, J. (2018). BDNF haploinsufficiency exerts a transient and regionally different influence upon oligodendroglial lineage cells during postnatal development. *Molecular and Cellular Neuroscience*, *90*(November 2017), 12–21. <https://doi.org/10.1016/j.mcn.2018.05.005>
- Nithianantharajah, J., & Hannan, A. J. (2006). Enriched environments, experience-dependent plasticity and disorders of the nervous system. *Nature Reviews. Neuroscience*, *7*(9), 697–709. <https://doi.org/10.1038/nrn1970>
- Okuda, H., Tatsumi, K., Makinodan, M., Yamauchi, T., Kishimoto, T., & Wanaka, A. (2009). Environmental enrichment stimulates progenitor cell proliferation in the amygdala. *Journal of Neuroscience Research*, *87*(16), 3546–3553.  
<https://doi.org/10.1002/jnr.22160>
- Saab, A. S., Tzvetavona, I. D., Trevisiol, A., Baltan, S., Dibaj, P., Kusch, K., ... Nave, K. A. (2016). Oligodendroglial NMDA Receptors Regulate Glucose Import and Axonal Energy Metabolism. *Neuron*, *91*(1), 119–132. <https://doi.org/10.1016/j.neuron.2016.05.016>
- Schain, A. J., Hill, R. A., & Grutzendler, J. (2014). Disease With Spectral Confocal Reflectance Microscopy. *Nature Medicine*, *20*(4), 443–449. <https://doi.org/10.1038/nm.3495>.Label-free
- Spitzer, S. O., Sitnikov, S., Kamen, Y., Evans, K. A., Kronenberg-Versteeg, D., Dietmann, S., ... Káradóttir, R. T. (2019). Oligodendrocyte Progenitor Cells Become Regionally Diverse and Heterogeneous with Age. *Neuron*, *0*(0), 1–13.  
<https://doi.org/10.1016/J.NEURON.2018.12.020>
- Sturrock, R. R. (1980). Myelination of the Mouse Corpus Callosum. *Neuropathology and Applied Neurobiology*, *6*(6), 415–420. <https://doi.org/10.1111/j.1365-2990.1980.tb00219.x>
- Timmler, S., & Simons, M. (2019). Grey matter myelination. *Glia*, (January), 1–8.  
<https://doi.org/10.1002/glia.23614>
- Venkataramani, V., Tanev, D. I., Strahle, C., Studier-Fischer, A., Fankhauser, L., Kessler, T., ... Kuner, T. (2019). Glutamatergic synaptic input to glioma cells drives brain tumour

- progression. *Nature*, 573(7775), 532–538. <https://doi.org/10.1038/s41586-019-1564-x>
- Venkatesh, H. S., Morishita, W., Geraghty, A. C., Silverbush, D., Gillespie, S. M., Arzt, M., ... Monje, M. (2019). Electrical and synaptic integration of glioma into neural circuits. *Nature*, 573(7775), 539–545. <https://doi.org/10.1038/s41586-019-1563-y>
- Waxman, S. G. (1980). Determinants of conduction velocity in myelinated nerve fibers. *Muscle & Nerve*, 3(2), 141–150. <https://doi.org/10.1002/mus.880030207>
- Xiao, L., Ohayon, D., McKenzie, I. A., Sinclair-Wilson, A., Wright, J. L., Fudge, A. D., ... Richardson, W. D. (2016). Rapid production of new oligodendrocytes is required in the earliest stages of motor-skill learning. *Nature Neuroscience*, 19(9), 1210–1217. <https://doi.org/10.1038/nn.4351>
- Yergert, K. M., Hines, J. H., & Appel, B. (2019). Neuronal Activity Enhances mRNA Localization to Myelin Sheaths During Development, 1–30.
- Yeung, M. S. Y., Zdunek, S., Bergmann, O., Bernard, S., Salehpour, M., Alkass, K., ... Fris??n, J. (2014). Dynamics of oligodendrocyte generation and myelination in the human brain. *Cell*, 159(4), 766–774. <https://doi.org/10.1016/j.cell.2014.10.011>
- Young, K. M., Psachoulia, K., Tripathi, R. B., Dunn, S. J., Cossell, L., Attwell, D., ... Richardson, W. D. (2013). Oligodendrocyte dynamics in the healthy adult CNS: Evidence for myelin remodeling. *Neuron*, 77(5), 873–885. <https://doi.org/10.1016/j.neuron.2013.01.006>
- Zhao, Y.-Y., Shi, X.-Y., Qiu, X., Lu, W., Yang, S., Li, C., ... Tang, Y. (2012). Enriched Environment Increases the Myelinated Nerve Fibers of Aged Rat Corpus Callosum. *The Anatomical Record: Advances in Integrative Anatomy and Evolutionary Biology*, 295(6), 999–1005. <https://doi.org/10.1002/ar.22446>

## Figures and figure legends

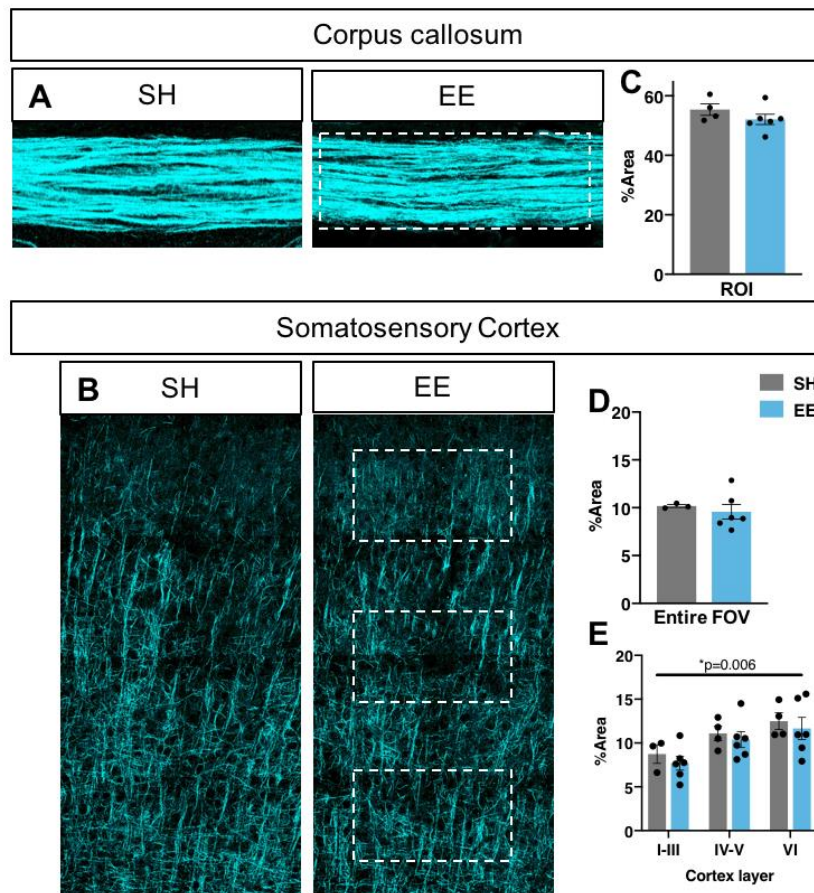

### Figure 1. Environmental enrichment exerts no influence on myelinated area

(A-B) Representative SCoRe images of corpus callosum (A) and somatosensory cortex (B) of control SH mice and EE housed mice. (C-E) Quantification of myelinated area as per percentage area of SCoRe signal measured in a corpus callosum ROI ( $p=0.25$ , unpaired two-tailed t-test) (C), across the entire somatosensory cortex ( $p=0.62$ , unpaired two-tailed t-test) (D) and in 3 layer-specific cortical ROIs (dotted outlines, 2-way ANOVA with Sidak's multiple comparisons) (E). C-E:  $n=3-6$  mice/group, data = mean  $\pm$  SEM.

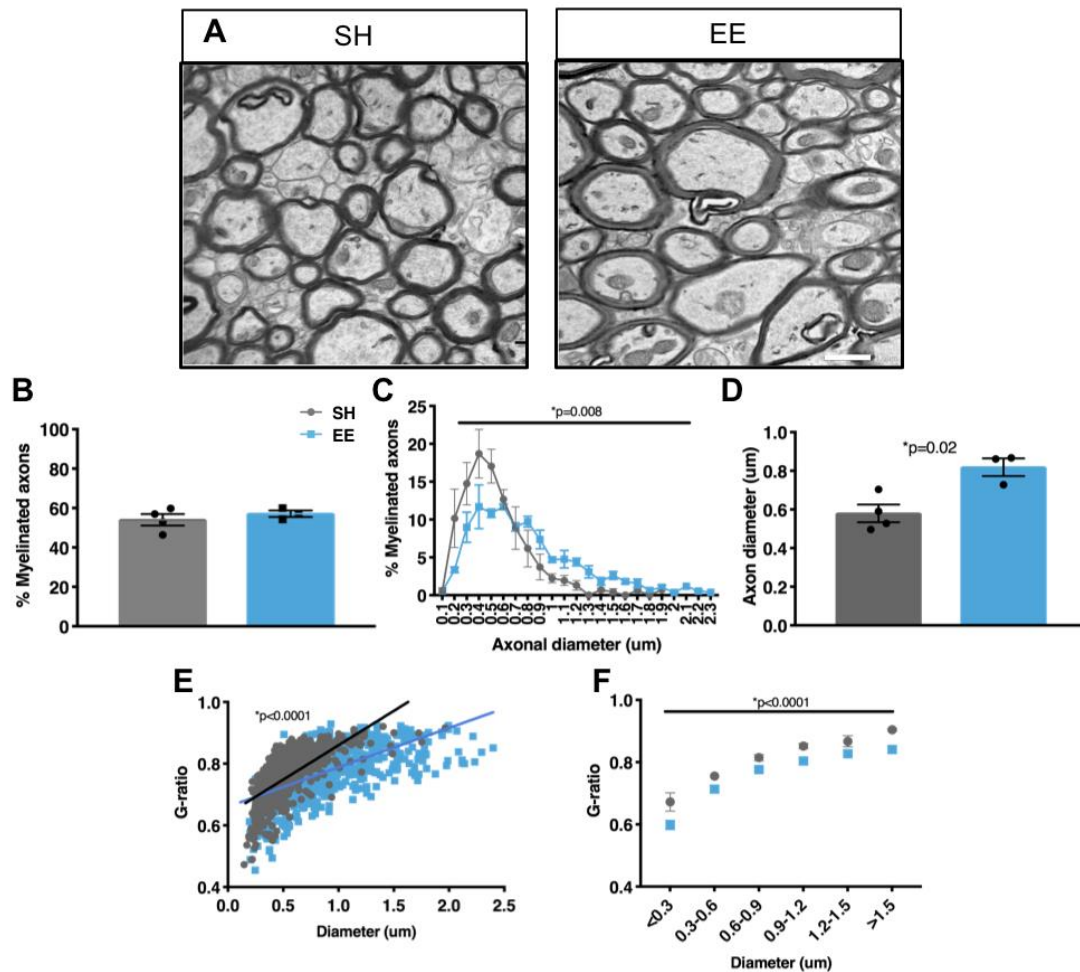

## Figure 2. Environmental enrichment increases axonal caliber and promotes myelinogenesis in the corpus callosum

(A) Representative EM micrographs of caudal corpus callosum of control SH or EE housed mice. Scale bar = 1 $\mu$ m. (B) Quantification of the percentage of myelinated axons in the corpus callosum (p=0.45, unpaired two-tailed t-test). (C) Frequency distribution of myelinated axons relative to diameter (2-way ANOVA; interaction p=0.008). (D) Quantification of average axon diameter in the corpus callosum (p=0.02, unpaired two-tailed t-test). (E) Scatter plot of g-ratio distribution of individual axons relative to axon diameter (linear regression analysis, p<0.0001). (F) Plot of average g-ratio binned by axon diameter (2-way ANOVA with Sidak's multiple comparison test; factors: housing p<0.0001, diameter p<0.0001, interaction p=0.8). For C-F: >100 axons/mouse/group, n=3-4 mice/group, data = mean $\pm$ SEM.

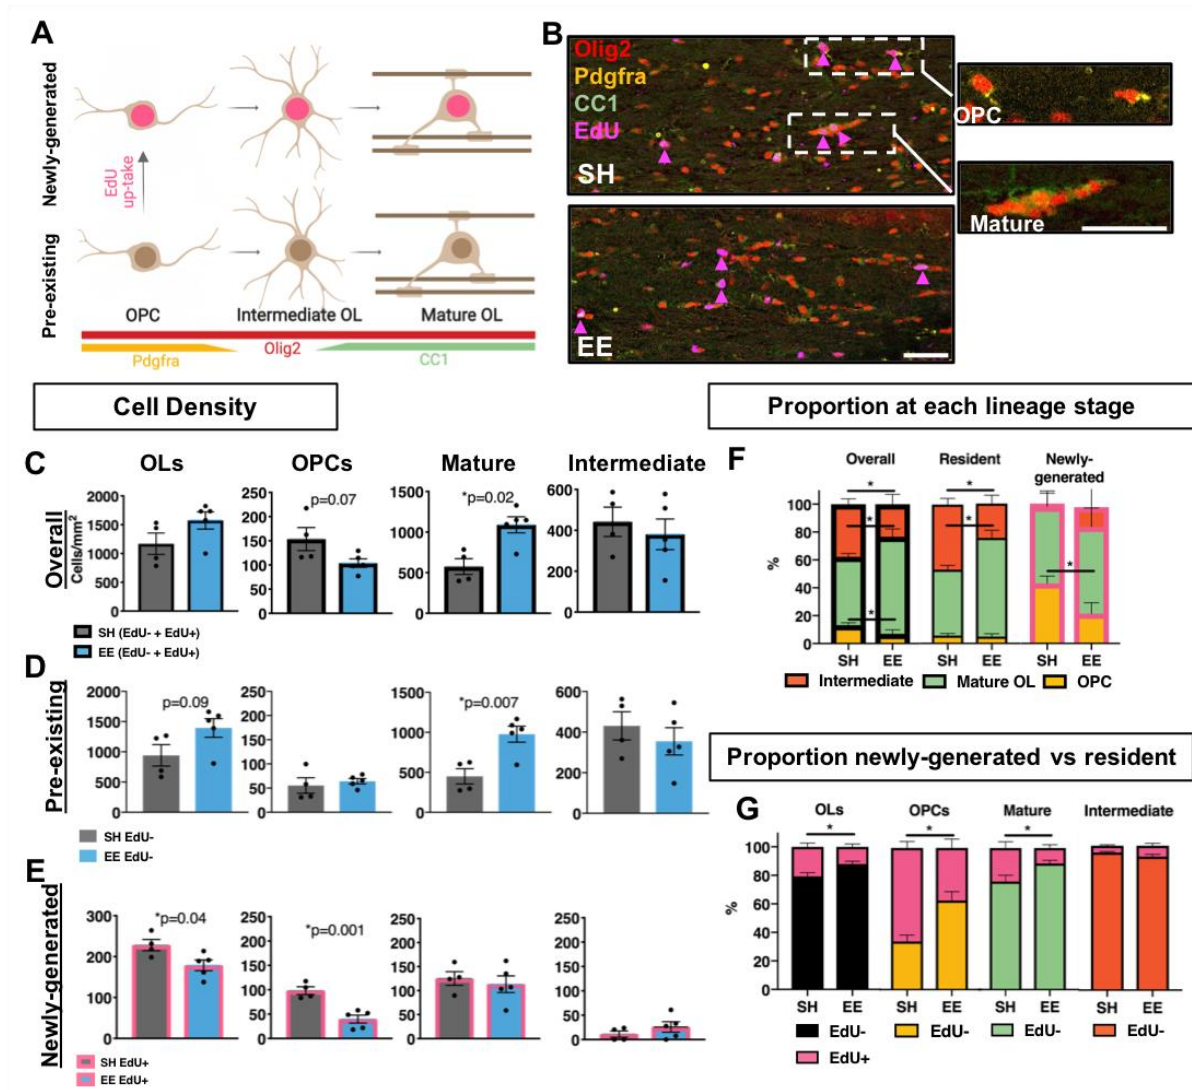

**Figure 3. Environmental enrichment enhances the differentiation of pre-existing oligodendrocytes in the corpus callosum.**

**(A)** Schematic of the markers used to label distinct stages of the oligodendroglial lineage. This image was created using BioRender.com. **(B)** Representative confocal micrographs of Olig2/EdU/PDGFR $\alpha$ /CC1 quadruple-immunostaining in the corpus callosum for SH or EE housed mice. Insert from SH animal depicts new-OLs (EdU+, pink arrows), OPCs

(Olig2+/PDGFR $\alpha$ +), and mature OLs (Olig2+/CC1+). Scale bar = 25 μm. **(C-E)** Quantification of the density of total oligodendroglia (Olig2+), as well as oligodendroglia sub-divided by lineage stage; OPCs (Olig2+/ PDGFR $\alpha$ +), mature OLs (Olig2+/CC1+) and intermediate oligodendroglia (Olig2+/ PDGFR $\alpha$ -/CC1-) in the corpus callosum. **(C)** Overall oligodendroglial densities [Pre-existing (EdU-) + Newly-generated (EdU+)] (OLs p=0.13, OPCs

p=0.07, Mature p=0.02, Intermediate p=0.58). **(D)** Pre-existing (EdU-) oligodendroglial

densities [Pre-existing (EdU-) + Newly-generated (EdU+)] (OLs p=0.13, OPCs p=0.07, Mature p=0.02, Intermediate p=0.58). **(E)** Pre-existing (EdU-) oligodendroglial densities [Pre-existing (EdU-) + Newly-generated (EdU+)] (OLs p=0.13, OPCs p=0.07, Mature p=0.02, Intermediate p=0.58). **(F)** Proportion of newly-generated vs resident cells in SH and EE mice. Significant differences are shown for OPCs (p=0.04) and Mature OLs (p=0.001). **(G)** Proportion of newly-generated vs resident cells by lineage stage in SH and EE mice. Significant differences are shown for OPCs (p=0.04) and Mature OLs (p=0.001).



densities (OLs  $p=0.09$ , OPCs  $p=0.58$ , Mature  $p=0.007$ , Intermediate  $p=0.46$ ). **(E)** Newly-generated (EdU+) oligodendroglial densities (OLs  $p=0.04$ , OPCs  $p=0.001$ , Mature  $p=0.62$ , Intermediate  $p=0.21$ ). **(F)** Quantification of the proportions of oligodendroglia at each stage of lineage development, for the overall population of oligodendroglia (OPCs  $p=0.006$ , Mature  $p=0.0002$ , Intermediates  $p=0.008$ ), the population of pre-existing (EdU-) oligodendroglia (OPCs  $p=0.57$ , Mature  $p=0.0001$ , Intermediates  $p=0.0005$ ) and the population of newly-generated (EdU+) oligodendroglia (OPCs  $p=0.002$ , Mature  $p=0.39$ , Intermediate  $p=0.18$ ). **(G)** Quantification of the proportions of newly-generated (EdU+) vs pre-existing (EdU-) oligodendroglia overall ( $p=0.03$ ), and at each lineage stage in the corpus callosum (OPCs  $p=0.009$ , Mature  $p=0.03$ , Intermediate  $p=0.30$ ). C-G:  $n=4-5$  mice/group, unpaired two-tailed t-test, data = mean  $\pm$  SEM.

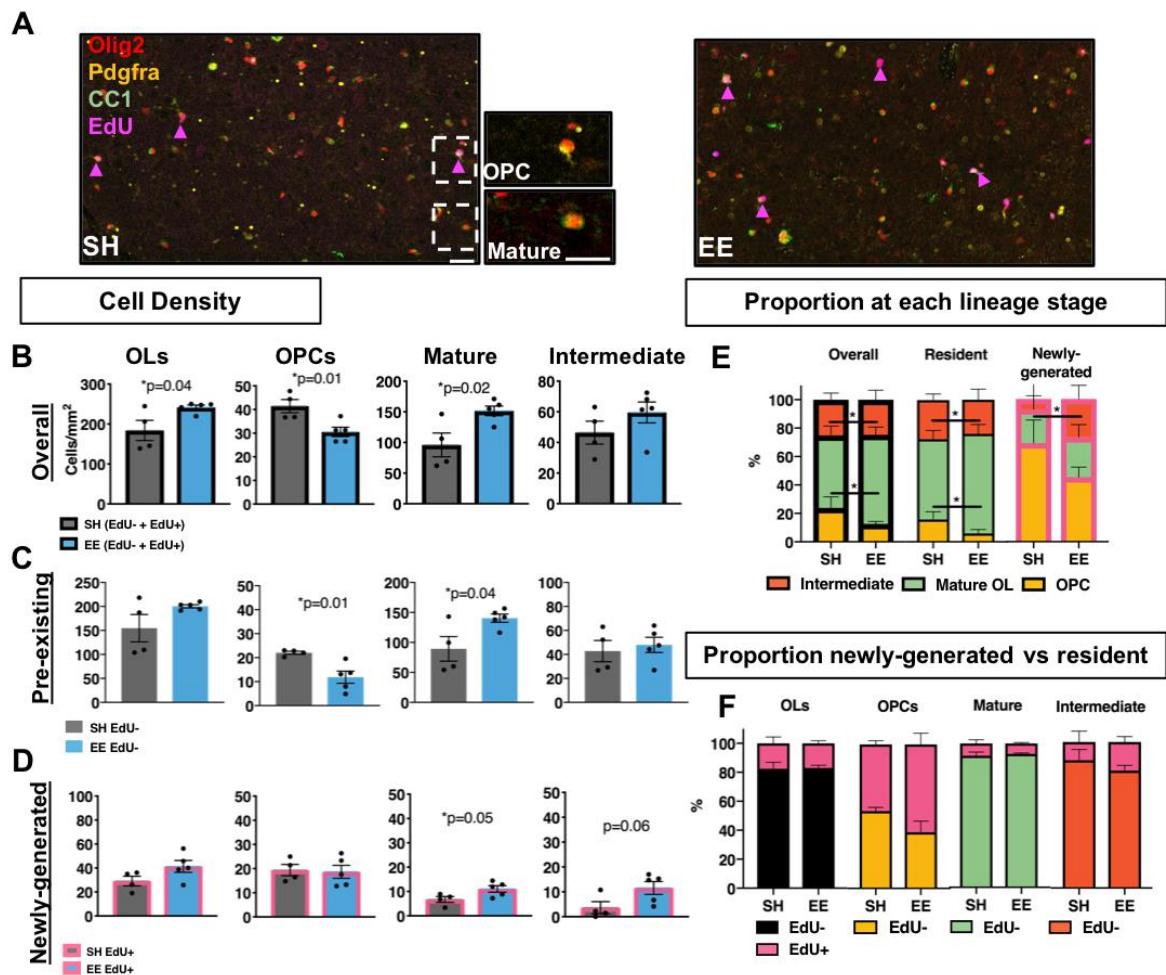

**Figure 4. Environmental enrichment enhances the differentiation of pre-existing and new oligodendroglia in the somatosensory cortex.**

**(A)** Representative confocal micrographs of Olig2/EdU/PDGFR $\alpha$ /CC1 quadruple-immunostaining in the somatosensory cortex for SH or EE house mice. Insert from SH animal depicts new- oligodendroglia (EdU+, pink arrows), OPCs (Olig2+/PDGFR $\alpha$ +) and mature OLs (Olig2+/CC1+). Scale bar = 25 $\mu$ m. **(B-D)** Quantification of the density of total oligodendroglia, as well as oligodendroglia sub-divided by lineage stage; OPCs, mature OLs and intermediate oligodendroglia in the somatosensory cortex. **(B)** Overall oligodendroglial densities (OLs p=0.04, OPCs p=0.01, Mature p=0.02, Intermediate p=0.24). **(C)** Pre-existing oligodendroglial densities (OLs p=0.11, OPCs p=0.01, Mature p=0.04, Intermediate p=0.64). **(D)** Newly-generated oligodendroglial densities (OLs p=0.11, OPCs p=0.85, Mature p=0.05, Intermediate p=0.06). **(E)** Quantification of the proportions of oligodendroglia at each stage of lineage development, for the overall population of oligodendroglia (OPCs: p=0.02, Mature: p=0.02, Intermediate p=0.9), the population of pre-existing (EdU-) oligodendroglia (OPCs: p=0.01, Mature: p=0.02, Intermediate p=0.44) and the population of newly-generated (EdU+) oligodendroglia (OPCs: p=0.02, Mature p=0.51, Intermediate p=0.07). **(F)** Quantification of the proportions of newly-generated (EdU+) vs pre-existing (EdU-) oligodendroglia overall (p=0.91) and at each lineage stage in the somatosensory cortex (OPCs p=0.15, Mature p=0.60, Intermediate p=0.36). B-F: n=4-5 mice/group, unpaired two-tailed t-test, data = mean  $\pm$  SEM.
